# Supplementary material for: Brugia malayi Gene Expression in Response to the Targeting of the Wolbachia Endosymbiont by Tetracycline Treatment
Source: PLoS Negl Trop Dis. 2009 Oct 6;3(10):e525. doi: 10.1371/journal.pntd.0000525 (PMC2754610; doi:10.1371/journal.pntd.0000525)
Supplement: Table S3 — Specific gene transcripts regulated at 7 d and 14 d post-treatment. This table supports Figure 2. It lists normalized and log ratio expression values of genes that are regulated at both 7 and 14 days post-treatment. (0.07 MB XLS) [file pntd.0000525.s003.xls]

## Sheet: 7d14d
Table S3. Specific gene transcripts regulated at 7d and 14d post-treatment
	7d				14d
Oligo Key	Systematic Oligo_ID	Model name	Fold Change	Log Ratio	Systematic Oligo_ID	Model name	Fold Change	Log Ratio	Annotation	Best Brugia CDS match or EST	Matching Pub_locus	C. elegans homolog
1	bm.01196	BMC05359	0.207672	-2.26762	bm.01196	BMC05359	0.247635	-2.01371	cuticular collagen	BMC05359
2	bm.00553	BMC02185	0.378019	-1.40347	bm.00553	BMC02185	0.464897	-1.10502	unknown	BMC02185
3	bm.03169	BMC00024	0.425055	-1.23428	bm.03169	BMC00024	2.16578	1.11489	ATP synthase F0 subunit 6 [Brugia malayi]	BMC00024
4	BMX12808	TC2798	0.45156	-1.14701	BMX12808	TC2798	0.340772	-1.55312	cuticular collagen Bmcol-2	TC2798
5	bm.03332	BMC06482	0.452944	-1.1426	bm.03332	BMC06482	0.31607	-1.66169	Cathepsin L-like precursor (CPL-4), putative	14514.m00011	Bm1_20385	CE22930
6	bm.03295	BMC04477	2.00743	1.00535	bm.03295	BMC04477	3.21449	1.68459	60S ribosomal protein L10, putative	14961.m05345	Bm1_34250	CE01543
7	BMX11757	BMW01267.350	2.00919	1.00661	BMX11757	BMW01267.350	0.380191	-1.3952	unknown	BMW01267.350
8	BMX13047	TC3046	2.09851	1.06936	BMX11073	W05384	2.05635	1.04008	GTP-binding nuclear protein RAN/TC4, putative	14979.m04454	Bm1_44725	CE16194
9	bm.01688	BMC11749	2.11143	1.07822	BMX11189	BMB_gene_8.247	2.94152	1.55656	fructose-bisphosphate aldolase 1, putative	14176.m00093	Bm1_15350	CE30646
10	BMX10436	AW179696	2.14921	1.10381	BMX10436	AW179696	2.29988	1.20156	unknown	AW179696
11	BMX13511, BMX12123	TC3524, WB-contig_1287	2.17	1.1177	bm.01138	BMC05056	4.90513	2.29429	Vacuolar protein sorting-associated protein 45, putative	14961.m05052	Bm1_32805	CE30898
12	bm.00610	BMC02427	2.2157	1.14777	bm.00610	BMC02427	2.52882	1.33847	EF hand family protein	15273.m00029	Bm1_55540	CE34292
13	BMX2479	14232.m00275	2.22349	1.15282	BMX2479	14232.m00275	2.14085	1.09819	hypothetical protein	14232.m00275	Bm1_16160
14	bm.01402	BMC06617	2.26358	1.17861	bm.01402	BMC06617	4.47872	2.16309	Probable ATP-dependent RNA helicase p47 homolog, putative	13367.m00046	Bm1_08205	CE26264
15	bm.00254	BMC00826	2.30027	1.2018	bm.00254	BMC00826	2.12426	1.08696	Elongation factor 1 gamma, conserved domain containing protein	14992.m11155	Bm1_51865	CE32385
16	bm.00235	BMC00748	2.33438	1.22304	BMX2805	14355.m00213	3.69707	1.88638	14-3-3-like protein 2, putative	13662.m00125	Bm1_10970	CE36489
17	BMX13142	TC3144	2.38425	1.25354	BMX13142	TC3144	2.17418	1.12047	40S ribosomal protein S4, putative	13260.m00097	Bm1_06615	CE24278
18	BMX4257	14894.m00090	2.41105	1.26966	BMX4257	14894.m00090	4.62412	2.20918	elongation factor 1-alpha (EF-1-alpha), putative	14894.m00090	Bm1_27170	CE32610
19	BMX851	13183.m00070	2.47369	1.30666	BMX851	13183.m00070	2.8026	1.48677	proteasome subunit alpha type 6, putative	13183.m00070	Bm1_05700	CE05371
20	BMX10490	AW561840	2.52776	1.33786	BMX10490	AW561840	2.15278	1.1062	unknown	AW561840
21	bm.00409	BMC01550	2.53529	1.34215	bm.00409	BMC01550	2.37703	1.24916	Eukaryotic translation initiation factor 5A-2, putative	15549.m00017	Bm1_57565	CE37787
22	bm.01565	BMC07946	2.58058	1.3677	bm.01565	BMC07946	2.21157	1.14507	initiation factor 2-associated protein., putative	14972.m07280	Bm1_37925	CE03743
23	BMX13144	TC3146	2.60566	1.38165	BMX13144	TC3146	2.31743	1.21252	Ribosomal Protein, Small subunit family member (rps-20) [Caenorhabditis elegans]	TC3146
24	bm.00430	BMC01633	2.68278	1.42373	bm.00430	BMC01633	0.491589	-1.02448	gb|AAA16306.1| unknown	BMC01633
25	BMX6958	14977.m04966	2.68841	1.42675	BMX6958	14977.m04966	2.69735	1.43154	hypothetical protein	14977.m04966	Bm1_43595	CE27472
26	BMX8336	14992.m11155	2.71707	1.44205	BMX8336	14992.m11155	4.16002	2.05659	Elongation factor 1 gamma, conserved domain containing protein	14992.m11155	Bm1_51865	CE32385
27	BMX12900, bm00877	TC2895, BMC03488	2.74	1.45418	bm.03239	BMC01632	4.53582	2.18136	60S ribosomal protein L5, putative	14961.m04902	Bm1_32050	CE02255
28	BMX5751	14972.m06982	2.7429	1.4557	BMX5751	14972.m06982	3.43787	1.78152	activated protein kinase C receptor RACK1	14972.m06982	Bm1_36465	CE00901
29	BMX1802	13785.m00207	2.87717	1.52465	BMX1802	13785.m00207	7.1919	2.84637	hypothetical protein	13785.m00207	Bm1_11840
30	BMX2759	14325.m00128	2.93169	1.55173	BMX2759	14325.m00128	3.92664	1.9733	Mak16 protein	14325.m00128	Bm1_17915	CE04006
31	BMX3776	14707.m00118	2.95069	1.56105	BMX12573	WB-contig_338	2.60622	1.38196	6330505F04Rik protein, putative	14707.m00118	Bm1_24260
32	BMX13551	TC3568	2.95255	1.56196	BMX13551	TC3568	2.64411	1.40278	La domain containing protein	14612.m00130	Bm1_22185	CE08718
33	BMX13034	TC3032	2.95632	1.5638	BMX13034	TC3032	2.15556	1.10806	40S ribosomal protein S23, putative	14981.m02412	Bm1_46875	CE05747
34	BMX12907	TC2902	3.04186	1.60496	BMX12907	TC2902	2.72254	1.44495	GTP-binding protein SAR1, putative	14972.m07055	Bm1_36820	CE02195
35	bm.00164	BMC00470	3.13827	1.64997	bm.00164	BMC00470	3.29928	1.72215	heat shock 70 kDa protein, putative	14977.m04983	Bm1_43675	CE02884
36	BMX5155	14961.m05025	3.1501	1.6554	BMX5155	14961.m05025	2.72201	1.44468	hypothetical protein	14961.m05025	Bm1_32670
37	BMX2112	14039.m00115	3.22322	1.6885	BMX2112	14039.m00115	3.6556	1.87011	60S ribosomal protein L3, putative	14039.m00115	Bm1_13895	CE36997
38	BMX12715	WB-contig_537	3.40953	1.76957	BMX12715	WB-contig_537	4.27436	2.09571	60S ribosomal protein L5, putative	14961.m04902	Bm1_32050	CE02255
39	bm.00387	BMC01461	3.42253	1.77506	bm.00408	BMC01549	8.97997	3.16671	Asparaginyl-tRNA synthetase, cytoplasmic, putative	14971.m02889	Bm1_36235	CE28801
40	BMX11229	BMW00043.108	3.42992	1.77818	BMX11229	BMW00043.108	2.67494	1.41951	Asparaginyl-tRNA synthetase, cytoplasmic, putative	14971.m02889	Bm1_36235	CE28801
41	bm.01075	BMC04437	3.528	1.81885	bm.01075	BMC04437	3.66321	1.87311	beta-tubulin, identical	14773.m00919	Bm1_25780	CE33987
42	BMX13131	TC3133	3.62105	1.85641	BMX13131	TC3133	4.78595	2.25881	heat shock protein 90, putative	14992.m11078	Bm1_51495	CE39622
43	BMX9743	AA588908	3.86276	1.94963	BMX9743	AA588908	3.93595	1.97671	Translationally controlled tumor protein, putative	14955.m00256	Bm1_31480	CE09656
44	bm.03280	BMC03443	3.86543	1.95063	bm.03280	BMC03443	5.64376	2.49666	Gln-rich protein [Onchocerca volvulus]	BMC03443
45	bm.01681	BMC11704	3.88235	1.95693	BMX9336	AA109462	2.03106	1.02223	FKBP-type peptidyl-prolyl cis-trans isomerase-59, BmFKBP59	15451.m00017	Bm1_56870	CE05813
46	BMX1282	13390.m00017	3.92515	1.97275	BMX1282	13390.m00017	3.59686	1.84674	hypothetical protein	13390.m00017	Bm1_08470
47	BMX374	12698.m00330	3.9662	1.98776	BMX374	12698.m00330	2.69134	1.42833	histone H4, putative	12698.m00330	Bm1_02515	CE16699
48	BMX9543	AA280466	4.00422	2.00152	BMX9543	AA280466	3.88798	1.95902	unknown	AA280466
49	bm.01123	BMC04968	4.04782	2.01714	bm.01123	BMC04968	2.66625	1.41481	NAC domain containing protein	13260.m00100	Bm1_06630	CE33239
50	BMX11347	BMW00248.43	4.08097	2.02891	BMX11347	BMW00248.43	3.42702	1.77696	Asparaginyl-tRNA synthetase, cytoplasmic, putative	14971.m02889	Bm1_36235	CE28801
51	BMX12914	TC2909	4.09862	2.03514	BMX9325	AA089376	3.12609	1.64436	26S proteasome non-ATPase regulatory subunit 7, putative	14971.m02852	Bm1_36060	CE18135
52	bm.01941	BMC02223	4.31017	2.10774	bm.01475	BMC07116	3.22506	1.68933	Ubiquitin-conjugating enzyme family protein	14990.m08098	Bm1_49860	CE37602
53	bm.00136	BMC00330	4.32738	2.1135	bm.03492	BMC12295	4.68674	2.22859	Alpha amylase, catalytic domain containing protein	12556.m00067	Bm1_01300	CE15694
54	BMX12705	WB-contig_526	4.40948	2.14061	BMX12705	WB-contig_526	6.42249	2.68313	RNA recognition motif containing protein, putative	14954.m01718	Bm1_31255	CE38662
55	BMX466	12791.m00116	4.52606	2.17825	BMX466	12791.m00116	2.24626	1.16752	conserved hypothetical protein	12791.m00116	Bm1_03160
56	bm.03498	BMC12312	4.61368	2.20592	bm.03498	BMC12312	2.78035	1.47526	60S ribosomal protein L4, putative	14058.m00567	Bm1_14285	CE07669
57	BMX11919	WB-contig_1039	4.80396	2.26422	BMX11919	WB-contig_1039	2.90165	1.53687	Casein kinase II, alpha chain, putative	14990.m08092	Bm1_49830	CE31696
58	BMX9213	15533.m00023	4.8069	2.26511	BMX9213	15533.m00023	3.32765	1.73451	hypothetical protein	15533.m00023	Bm1_57465
59	BMX12550	WB-contig_300	4.87403	2.28512	BMX12550	WB-contig_300	4.18723	2.066	Asparaginyl-tRNA synthetase, cytoplasmic, putative	14971.m02889	Bm1_36235	CE28801
60	bm.02181	BMC07717	5.48355	2.45511	bm.02181	BMC07717	7.85788	2.97414	Endoplasmin precursor, putative	14972.m07646	Bm1_39715	CE39622
61	bm.03284	BMC03611	6.00427	2.58599	bm.03284	BMC03611	4.61841	2.2074	calreticulin precursor, putative	14677.m00169	Bm1_23560	CE00423
62	bm.03528	BMC12461	6.75374	2.75569	bm.03528	BMC12461	6.7609	2.75722	calreticulin precursor, putative	14677.m00169	Bm1_23560	CE00423
63	BMX11176	BMB_gene_5.350	6.7956	2.7646	BMX11176	BMB_gene_5.350	8.09005	3.01615	Asparaginyl-tRNA synthetase, cytoplasmic, putative	14971.m02889	Bm1_36235	CE28801
64	BMX10360	AW042023	6.99599	2.80653	BMX10360	AW042023	5.30723	2.40796	enolase [Onchocerca volvulus]	AW042023
65	bm.00336	BMC01154	7.89217	2.98042	bm.00336	BMC01154	2.0568	1.0404	Gln-rich protein [Onchocerca volvulus]	BMC01154
