# Supplementary material for: Brugia malayi Gene Expression in Response to the Targeting of the Wolbachia Endosymbiont by Tetracycline Treatment
Source: PLoS Negl Trop Dis. 2009 Oct 6;3(10):e525. doi: 10.1371/journal.pntd.0000525 (PMC2754610; doi:10.1371/journal.pntd.0000525)
Supplement: Table S5 — GO annotation of regulated transcripts at 7 and 14 days post-treatment. Table S5A lists GO terms associated with upregulation; Table S5B lists GO terms associated with downregulation. (0.18 MB XLS) [file pntd.0000525.s005.xls]

## Sheet: Upregulated
Table S5A. GO annotation of upregulated transcripts at 7 and 14 days after drug treatment
[note: numbers in italic indicate a p-value > 0.05 which reflects low significance]
		7d Upregulated					14d Upregulated
GOID	Term	Genes regulated	Number on the array	Log odds-ratio	p-value		Genes regulated	Number on the array	Log odds-ratio	p-value
Biological Process
GO:0006323	DNA packaging						4	25	2.666	0.01042
GO:0006325	establishment or maintenance of chromatin architecture						6	63	1.918	0.02581
GO:0006334	nucleosome assembly						4	25	2.666	0.01042
GO:0006338	chromatin remodeling						2	6	3.725	0.009615
GO:0006399	tRNA metabolic process	5	101	1.877	0.06889		7	101	1.459	0.07499
GO:0006412	translation	21	364	2.098	5.284e-07		32	364	1.802	2.684e-08
GO:0006413	translational initiation						3	26	2.195	0.07499
GO:0006414	translational elongation	3	29	2.941	0.02192		6	29	3.037	0.0002989
GO:0006418	tRNA aminoacylation for protein translation	5	64	2.536	0.0101		6	64	1.895	0.02706
GO:0006421	asparaginyl-tRNA aminoacylation	5	7	5.728	2.787e-08		6	7	5.088	3.899e-09
GO:0006422	aspartyl-tRNA aminoacylation	5	13	4.835	2.134e-06		6	13	4.195	1.383e-06
GO:0006457	protein folding	8	83	2.839	0.0001197		11	83	2.394	6.933e-05
GO:0006461	protein complex assembly						7	29	3.259	3.316e-05
GO:0006519	cellular amino acid and derivative metabolic process	6	114	1.966	0.02907
GO:0006520	amino acid metabolic process	6	102	2.126	0.0181
GO:0006807	nitrogen compound metabolic process	6	113	1.978	0.028
GO:0006887	exocytosis	2	16	3.214	0.03899
GO:0006904	vesicle docking during exocytosis	2	13	3.513	0.02343
GO:0006913	nucleocytoplasmic transport	1	7	3.406	0.09765
GO:0007017	microtubule-based process						7	52	2.417	0.001596
GO:0007018	microtubule-based movement						7	39	2.832	0.0002378
GO:0008150	biological_process						113	3772	0.249	0.02706
GO:0008152	metabolic process	50	2434	0.608	0.003131		89	2434	0.537	0.0001543
GO:0009057	macromolecule catabolic process						9	144	1.31	0.06927
GO:0009058	biosynthetic process	23	642	1.411	0.0001764		36	642	1.154	6.933e-05
GO:0009059	macromolecule biosynthetic process	22	520	1.651	2.621e-05		36	520	1.458	6.584e-07
GO:0009308	cellular amine metabolic process	6	111	2.004	0.02595
GO:0009987	cellular process	59	2741	0.676	3.754e-05		97	2741	0.49	0.0001504
GO:0010467	gene expression	27	549	1.868	1.264e-07		40	549	1.531	3.442e-08
GO:0010926	anatomical structure formation						11	84	2.377	7.394e-05
GO:0016043	cellular component organization						13	177	1.543	0.004887
GO:0016070	RNA metabolic process	10	234	1.665	0.01241
GO:0019538	protein metabolic process	37	1257	1.127	2.484e-05		59	1257	0.897	1.237e-05
GO:0022406	membrane docking	2	15	3.307	0.03338
GO:0022607	cellular component assembly						11	84	2.377	7.394e-05
GO:0030705	cytoskeleton-dependent intracellular transport						7	39	2.832	0.0002378
GO:0031497	chromatin assembly						4	25	2.666	0.01042
GO:0032940	secretion by cell	2	17	3.126	0.04501
GO:0034621	cellular macromolecular complex subunit organization						11	88	2.31	0.000117
GO:0034622	cellular macromolecular complex assembly						11	79	2.466	4.303e-05
GO:0034641	cellular nitrogen compound metabolic process	6	112	1.991	0.02696
GO:0034645	cellular macromolecule biosynthetic process	22	519	1.653	2.621e-05		36	519	1.46	6.584e-07
GO:0034660	ncRNA metabolic process	6	123	1.856	0.04178
GO:0034728	nucleosome organization						4	25	2.666	0.01042
GO:0034960	cellular biopolymer metabolic process	42	1594	0.967	4.351e-05		68	1594	0.759	3.316e-05
GO:0034961	cellular biopolymer biosynthetic process	22	485	1.751	1.005e-05		36	485	1.558	1.545e-07
GO:0043038	amino acid activation	5	65	2.513	0.01056		6	65	1.873	0.02915
GO:0043039	tRNA aminoacylation	5	65	2.513	0.01056		6	65	1.873	0.02915
GO:0043170	macromolecule metabolic process	45	1690	0.983	1.259e-05		73	1690	0.777	6.704e-06
GO:0043283	biopolymer metabolic process	43	1642	0.959	3.734e-05		70	1642	0.758	2.15e-05
GO:0043284	biopolymer biosynthetic process	22	485	1.751	1.005e-05		36	485	1.558	1.545e-07
GO:0043623	cellular protein complex assembly						7	26	3.417	1.596e-05
GO:0043933	macromolecular complex subunit organization						11	89	2.294	0.0001291
GO:0044085	cellular component biogenesis						11	117	1.899	0.001366
GO:0044237	cellular metabolic process	48	2030	0.811	8.895e-05		79	2030	0.627	8.384e-05
GO:0044238	primary metabolic process	49	2044	0.831	4.351e-05		85	2044	0.722	1.383e-06
GO:0044249	cellular biosynthetic process	23	605	1.496	7.221e-05		36	605	1.239	2.15e-05
GO:0044260	cellular macromolecule metabolic process	44	1638	0.995	1.42e-05		71	1638	0.782	9.777e-06
GO:0044265	cellular macromolecule catabolic process						8	117	1.44	0.05822
GO:0044267	cellular protein metabolic process	36	1220	1.131	3.157e-05		58	1220	0.915	1.093e-05
GO:0046903	secretion	2	17	3.126	0.04501
GO:0046907	intracellular transport						12	129	1.884	0.0008586
GO:0048278	vesicle docking	2	15	3.307	0.03338
GO:0051169	nuclear transport	1	7	3.406	0.09765
GO:0051258	protein polymerization						7	22	3.658	4.451e-06
GO:0051276	chromosome organization						6	68	1.808	0.03742
GO:0051641	cellular localization						13	155	1.734	0.001332
GO:0051649	establishment of localization in cell	6	146	1.609	0.09442		13	146	1.821	0.0007572
GO:0065003	macromolecular complex assembly						11	82	2.412	6.33e-05
GO:0070271	protein complex biogenesis						7	29	3.259	3.316e-05
Cellular Component
GO:0000228	nuclear chromosome						2	6	3.725	0.009615
GO:0000502	proteasome complex						5	33	2.588	0.00525
GO:0000785	chromatin	3	45	2.307	0.08518
GO:0000786	nucleosome	2	23	2.69	0.09533		4	23	2.787	0.007555
GO:0005622	intracellular	47	2070	0.753	0.0004154		76	2070	0.543	0.001109
GO:0005694	chromosome						7	72	1.948	0.01256
GO:0005737	cytoplasm	30	713	1.643	4.349e-07		45	713	1.324	1.826e-07
GO:0005743	mitochondrial inner membrane						4	31	2.356	0.02581
GO:0005839	proteasome core complex						5	27	2.877	0.001697
GO:0005840	ribosome	12	243	1.874	0.001357		18	243	1.555	0.0004795
GO:0005853	eukaryotic translation elongation factor 1 complex	2	8	4.214	0.007588		4	8	4.31	4.303e-05
GO:0005856	cytoskeleton						9	141	1.34	0.06083
GO:0005874	microtubule						7	22	3.658	4.451e-06
GO:0015630	microtubule cytoskeleton						8	55	2.529	0.0004002
GO:0016469	proton-transporting two-sector ATPase complex						2	8	3.31	0.02227
GO:0019866	organelle inner membrane						4	31	2.356	0.02581
GO:0030126	COPI vesicle coat	1	5	3.892	0.05331
GO:0030137	COPI-coated vesicle	1	5	3.892	0.05331
GO:0030529	ribonucleoprotein complex	15	272	2.033	4.96e-05		19	272	1.471	0.0006654
GO:0030663	COPI coated vesicle membrane	1	5	3.892	0.05331
GO:0031966	mitochondrial membrane	4	36	2.14	0.0435
GO:0032991	macromolecular complex	24	658	1.437	8.557e-05		46	658	1.472	6.204e-09
GO:0032993	protein-DNA complex	4	24	2.725	0.009236
GO:0043226	organelle	29	1193	0.851	0.01155		51	1193	0.762	0.0008586
GO:0043228	non-membrane-bounded organelle	16	458	1.374	0.006243		34	458	1.558	3.358e-07
GO:0043229	intracellular organelle	29	1193	0.851	0.01155		51	1193	0.762	0.0008586
GO:0043232	intracellular non-membrane-bounded organelle	16	458	1.374	0.006243		34	458	1.558	3.358e-07
GO:0043234	protein complex	23	364	1.326	0.0005657
GO:0044420	extracellular matrix part	1	6	3.629	0.07545
GO:0044422	organelle part	23	382	1.256	0.001109
GO:0044424	intracellular part	44	1495	1.127	1.508e-06		71	1495	0.914	3.059e-07
GO:0044427	chromosomal part						5	51	1.96	0.04028
GO:0044429	mitochondrial part						5	58	1.774	0.06766
GO:0044430	cytoskeletal part						9	98	1.865	0.005647
GO:0044444	cytoplasmic part	18	510	1.389	0.002369		32	510	1.316	2.918e-05
GO:0044446	intracellular organelle part	23	382	1.256	0.001109
Molecular Function
GO:0000166	nucleotide binding	26	1193	0.694	0.08518		49	1193	0.704	0.003173
GO:0003676	nucleic acid binding	29	1229	0.808	0.01834		45	1229	0.539	0.05313
GO:0003723	RNA binding	9	206	1.697	0.0181		12	206	1.209	0.04474
GO:0003735	structural constituent of ribosome	12	240	1.892	0.001225		18	240	1.573	0.0004079
GO:0003743	translation initiation factor activity	3	27	2.14	0.08461
GO:0003746	translation elongation factor activity	3	18	3.629	0.005299		5	18	3.462	0.0001981
GO:0003755	peptidyl-prolyl cis-trans isomerase activity						3	24	2.31	0.06031
GO:0003924	GTPase activity						9	65	2.458	0.0002378
GO:0004177	aminopeptidase activity						3	12	3.31	0.005647
GO:0004298	threonine-type endopeptidase activity						5	27	2.877	0.001697
GO:0004332	fructose-bisphosphate aldolase activity	1	5	3.892	0.05331		2	5	3.988	0.005338
GO:0004812	aminoacyl-tRNA ligase activity	5	64	2.536	0.0101		6	64	1.895	0.02706
GO:0004815	aspartate-tRNA ligase activity	5	13	4.835	2.134e-06		6	13	4.195	1.383e-06
GO:0004816	asparagine-tRNA ligase activity	5	7	5.728	2.787e-08		6	7	5.088	3.899e-09
GO:0005198	structural molecule activity	16	403	1.559	0.001409		25	403	1.299	0.0003717
GO:0005525	GTP binding						14	176	1.658	0.001332
GO:0008135	translation factor activity, nucleic acid binding	4	50	2.57	0.02108		8	50	2.666	0.0001981
GO:0008233	peptidase activity						13	236	1.128	0.05313
GO:0008238	exopeptidase activity						4	26	2.61	0.0125
GO:0008565	protein transporter activity						3	27	2.14	0.08461
GO:0016616	oxidoreductase activity, acting on the CH-OH group of donors, NAD or NADP as acceptor						2	10	2.988	0.04028
GO:0016832	aldehyde-lyase activity	1	6	3.629	0.07545		2	6	3.725	0.009615
GO:0016859	cis-trans isomerase activity	3	24	2.31	0.06031
GO:0016874	ligase activity	6	139	1.68	0.07545
GO:0016875	ligase activity, forming carbon-oxygen bonds	5	64	2.536	0.0101		6	64	1.895	0.02706
GO:0016876	ligase activity, forming aminoacyl-tRNA and related compounds	5	64	2.536	0.0101		6	64	1.895	0.02706
GO:0019001	guanyl nucleotide binding						14	181	1.618	0.001697
GO:0019207	kinase regulator activity						2	12	2.725	0.06233
GO:0019843	rRNA binding	4	8	5.214	5.159e-06		2	8	3.31	0.02227
GO:0032561	guanyl ribonucleotide binding	14	176	1.658	0.001332
GO:0045182	translation regulator activity	4	50	2.57	0.02108		8	50	2.666	0.0001981
GO:0051082	unfolded protein binding	7	63	3.044	0.0001372		9	63	2.503	0.0001974
GO:0070003	threonine-type peptidase activity						5	27	2.877	0.001697
GO:0070011	peptidase activity, acting on L-amino acid peptides						13	223	1.21	0.03513

## Sheet: Downregulated
Table S5B. GO annotation of downregulated transcripts at 7 and 14 days after drug treatment
[note: rows in italic indicate a p-value > 0.05 which reflects low significance]
		7d Downregulated					14d Downregulated
GOID	Term	Genes regulated	Number on the array	Log odds-ratio	p-value		Genes regulated	Number on the array	Log odds-ratio	p-value
Biological Process
GO:0006139	nucleobase, nucleoside, nucleotide and nucleic acid metabolic process	2	566	2.156	0.06817
GO:0006259	DNA metabolic process	1	174	2.858	0.07547
GO:0006281	DNA repair	1	55	4.52	0.01971
GO:0006289	nucleotide-excision repair	1	11	6.842	0.004503
GO:0006396	RNA processing	1	126	3.324	0.0444
GO:0006399	tRNA metabolic process	1	101	3.643	0.03494
GO:0006950	response to stress	1	96	3.716	0.03461		2	96	4.716	0.0005966
GO:0006974	response to DNA damage stimulus	1	56	4.494	0.01971
GO:0006979	response to oxidative stress						2	14	7.494	2.79e-06
GO:0008033	tRNA processing	1	37	5.092	0.01545
GO:0008152	metabolic process	4	2434	1.052	0.0871
GO:0009451	RNA modification	1	34	5.214	0.0152
GO:0010467	gene expression	2	549	2.2	0.06462
GO:0033554	cellular response to stress	1	56	4.494	0.01971
GO:0034470	ncRNA processing	1	59	4.418	0.01971
GO:0034660	ncRNA metabolic process	1	123	3.359	0.04391
GO:0034960	cellular biopolymer metabolic process	4	1594	1.663	0.02046
GO:0034984	cellular response to DNA damage stimulus	1	55	4.52	0.01971
GO:0042221	response to chemical stimulus						2	19	7.053	6.182e-06
GO:0043170	macromolecule metabolic process	4	1690	1.578	0.02245
GO:0043283	biopolymer metabolic process	4	1642	1.62	0.02046
GO:0044237	cellular metabolic process	4	2030	1.314	0.04391
GO:0044238	primary metabolic process	4	2044	1.304	0.04391
GO:0044260	cellular macromolecule metabolic process	4	1638	1.623	0.02046
GO:0050896	response to stimulus	1	104	3.601	0.03548		2	104	4.601	0.000683
GO:0051716	cellular response to stimulus	1	56	4.494	0.01971
Molecular Function
GO:0003674	molecular_function	5	5598	0.172	0		5	5598	0.172	0
GO:0003824	catalytic activity						4	2325	1.118	0.09082
GO:0004601	peroxidase activity						2	14	7.494	2.79e-06
GO:0004602	glutathione peroxidase activity						2	5	8.979	1.92e-07
GO:0005198	structural molecule activity	2	403	2.646	0.03488
GO:0008234	cysteine-type peptidase activity	1	58	4.443	0.01971		1	58	4.443	0.01192
GO:0008234	cysteine-type peptidase activity
GO:0009982	pseudouridine synthase activity	1	18	6.131	0.006205
GO:0016209	antioxidant activity						2	28	6.494	1.788e-05
GO:0016491	oxidoreductase activity						3	280	3.757	0.0003685
GO:0016684	oxidoreductase activity, acting on peroxide as acceptor						2	14	7.494	2.79e-06
GO:0016853	isomerase activity	1	69	4.193	0.02046
GO:0016866	intramolecular transferase activity	1	20	5.979	0.006205
GO:0042302	structural constituent of cuticle	1	70	4.172	0.02046
